# Supplementary material for: Contactless Sleep Monitoring for Early Detection of Health Deteriorations in Community-Dwelling Older Adults: Exploratory Study
Source: PubMed Central journal article supplement (PMC8235297; doi:10.2196/24666), 2021-06-11

Average Nightly Heart Rate

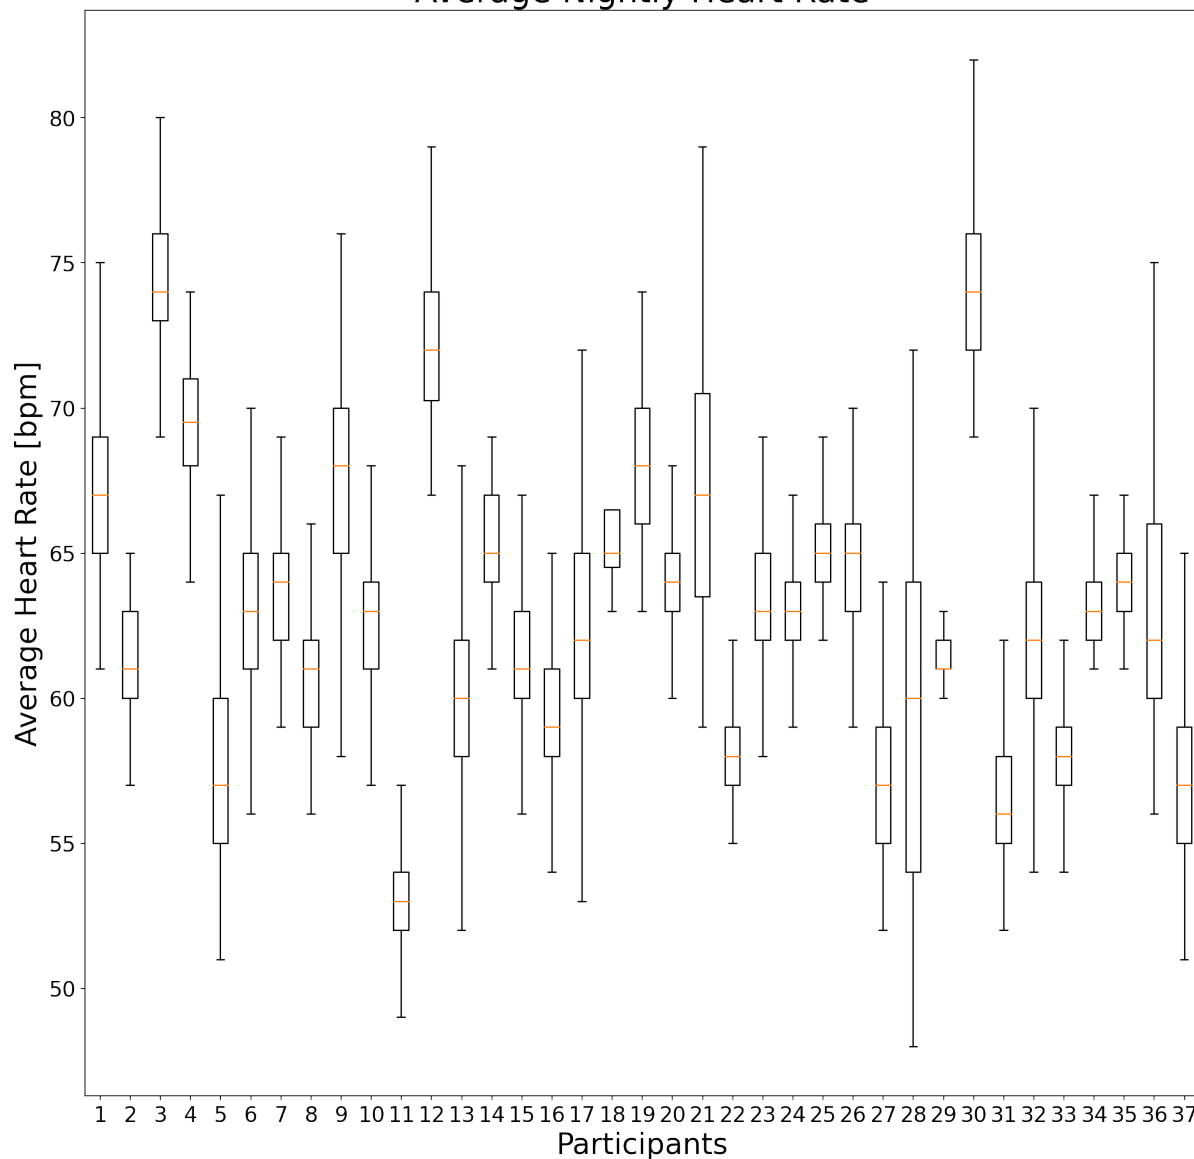

Number Toss & Turn Counts per Night

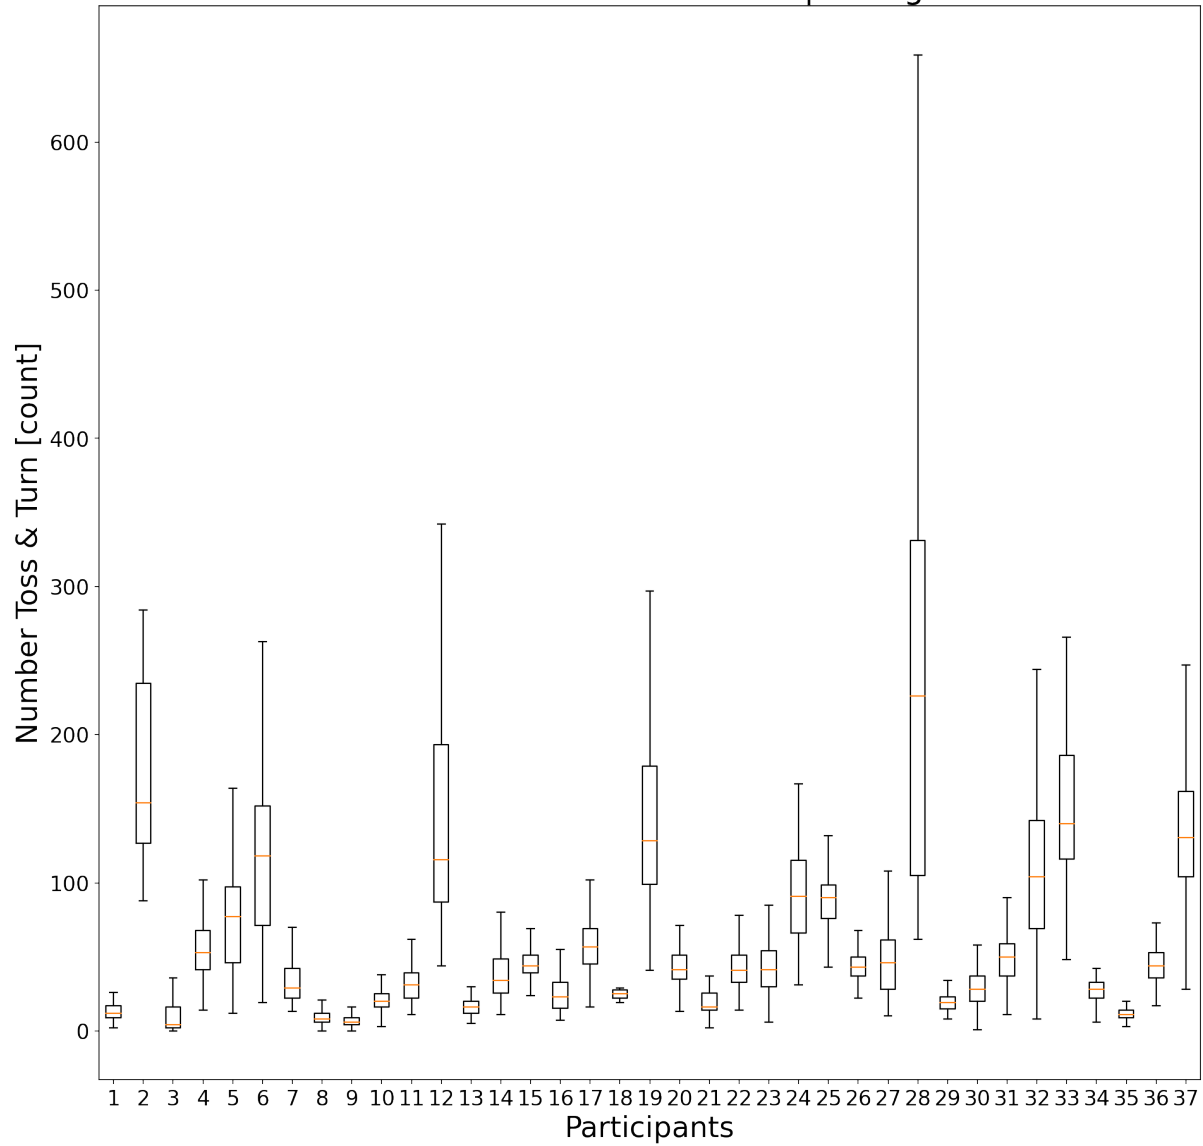

# Sleep Efficiency

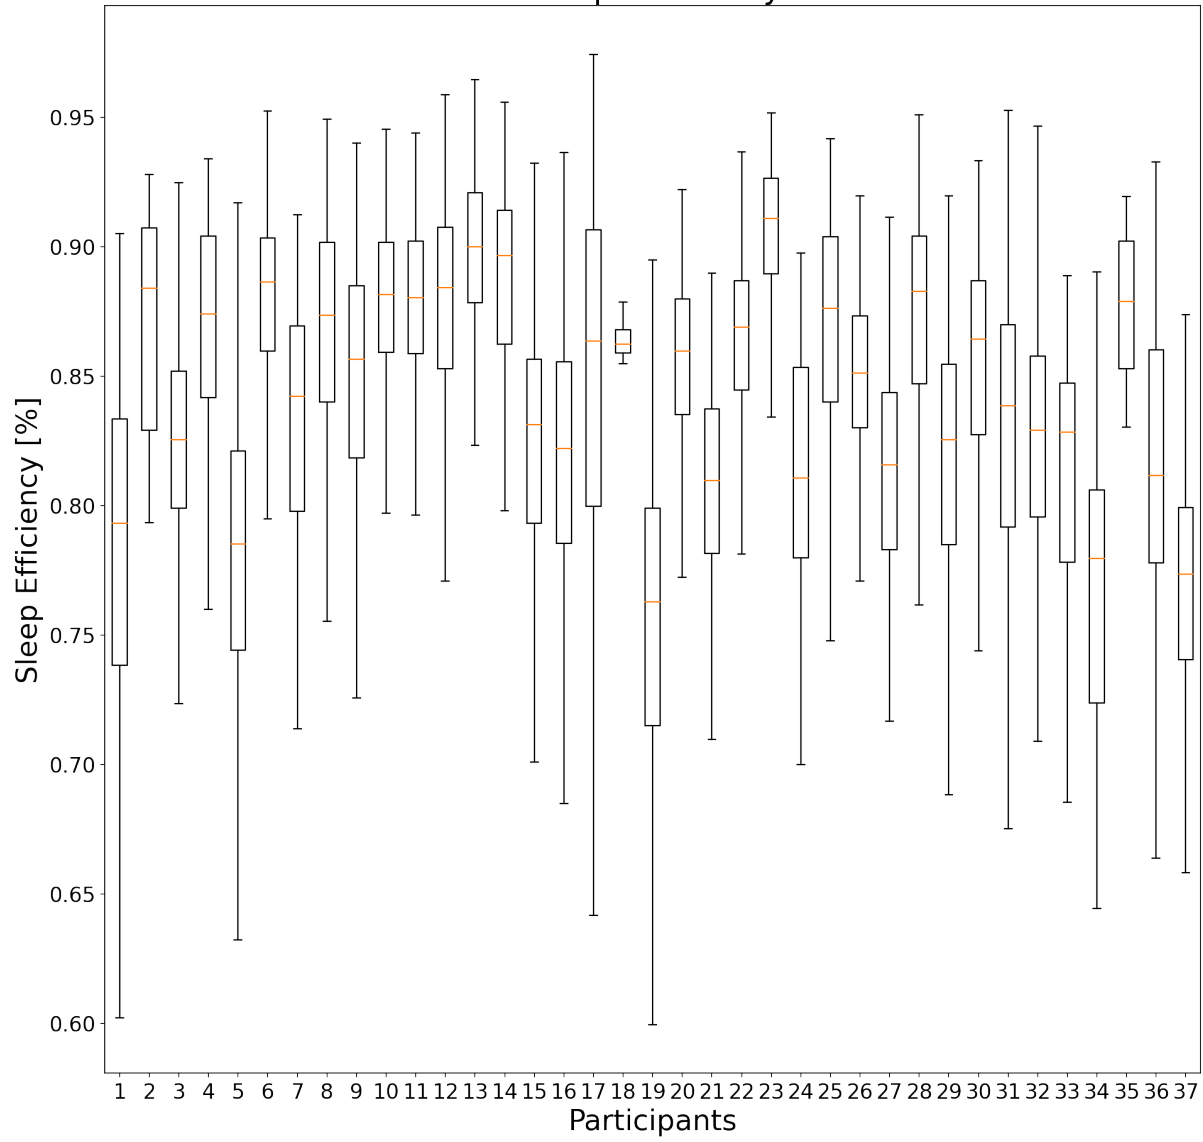

Percent in REM Sleep

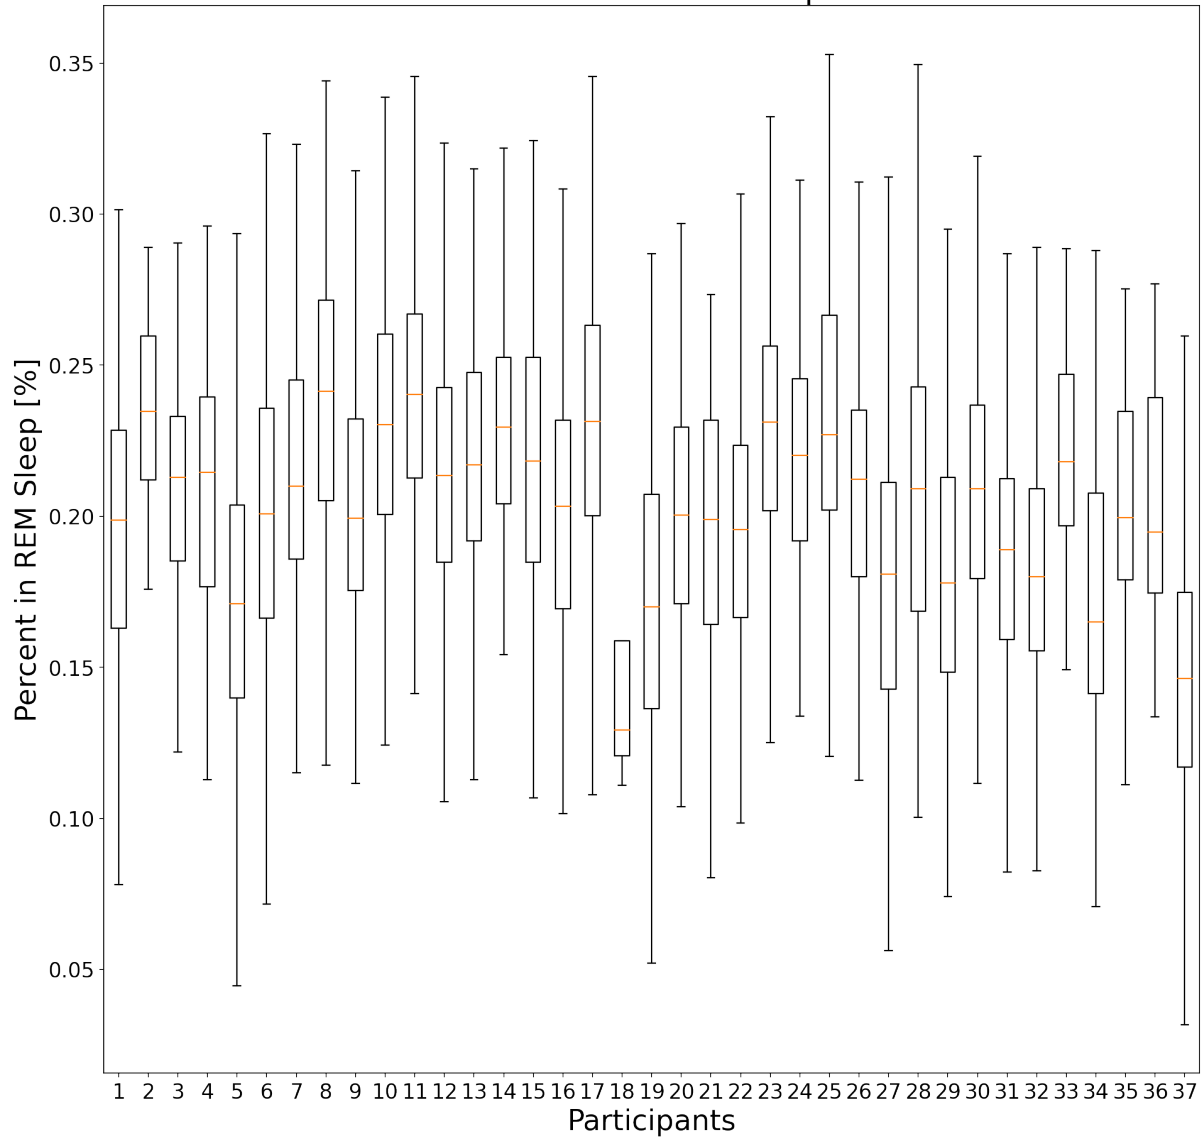

Percent in Light Sleep

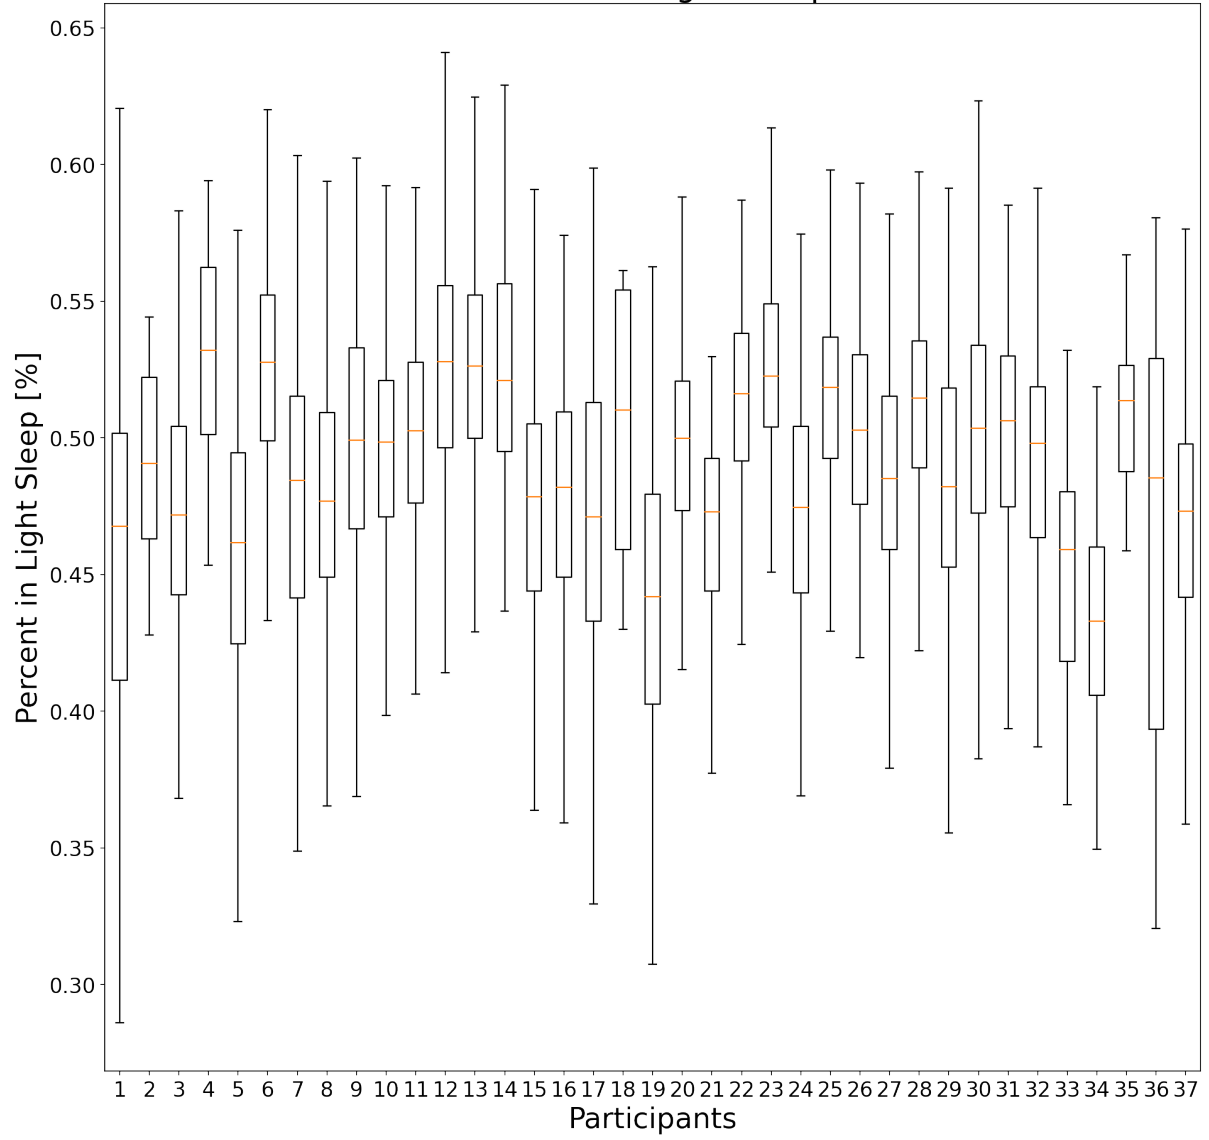

Percent in Deep Sleep

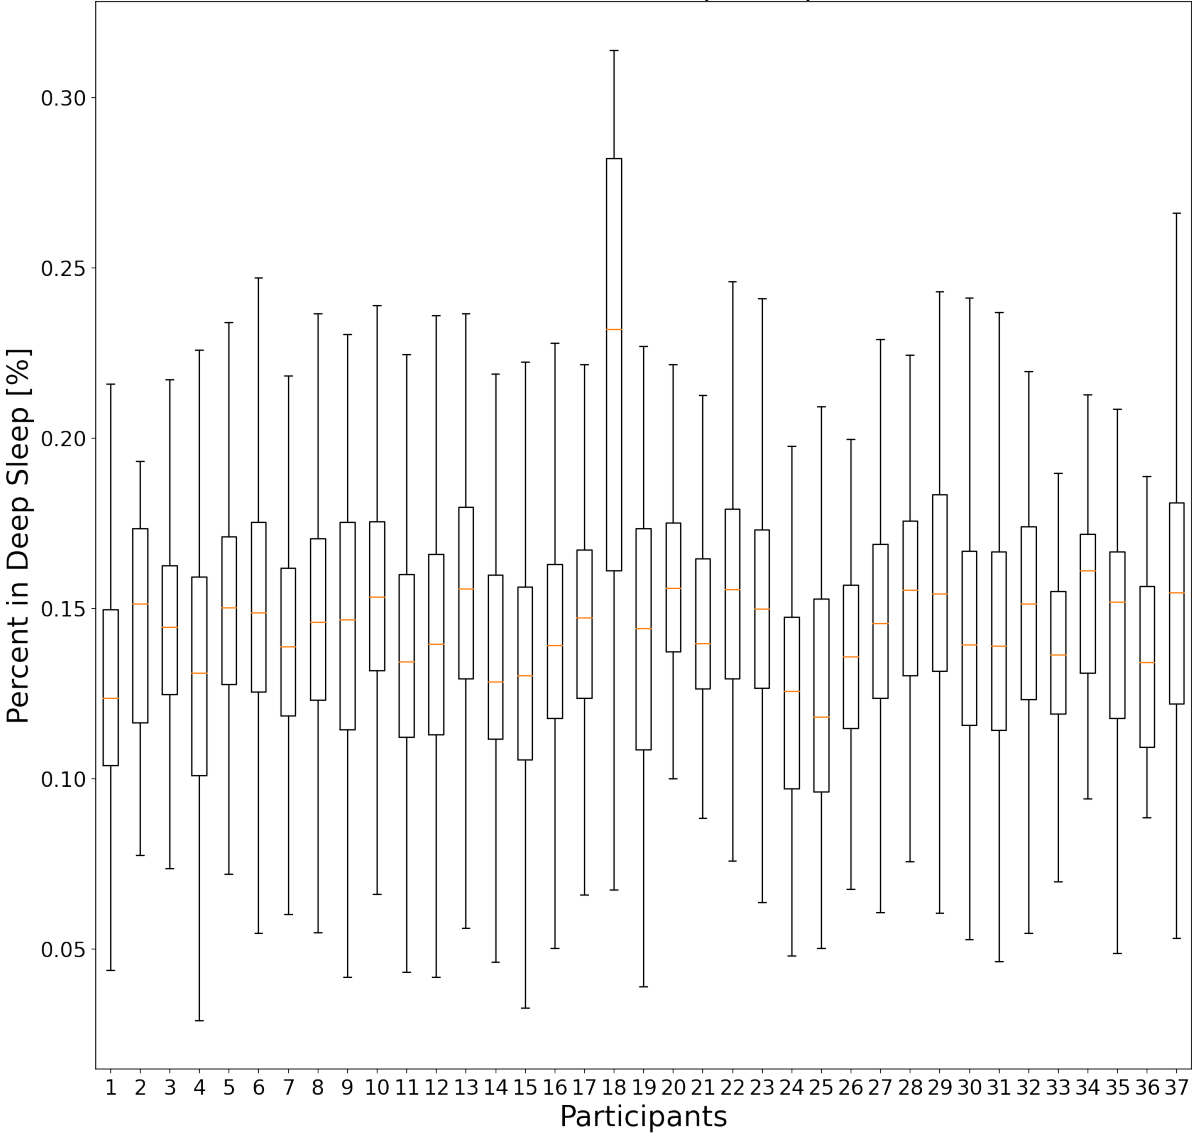

### Heart Rate Variability Low Frequency Band

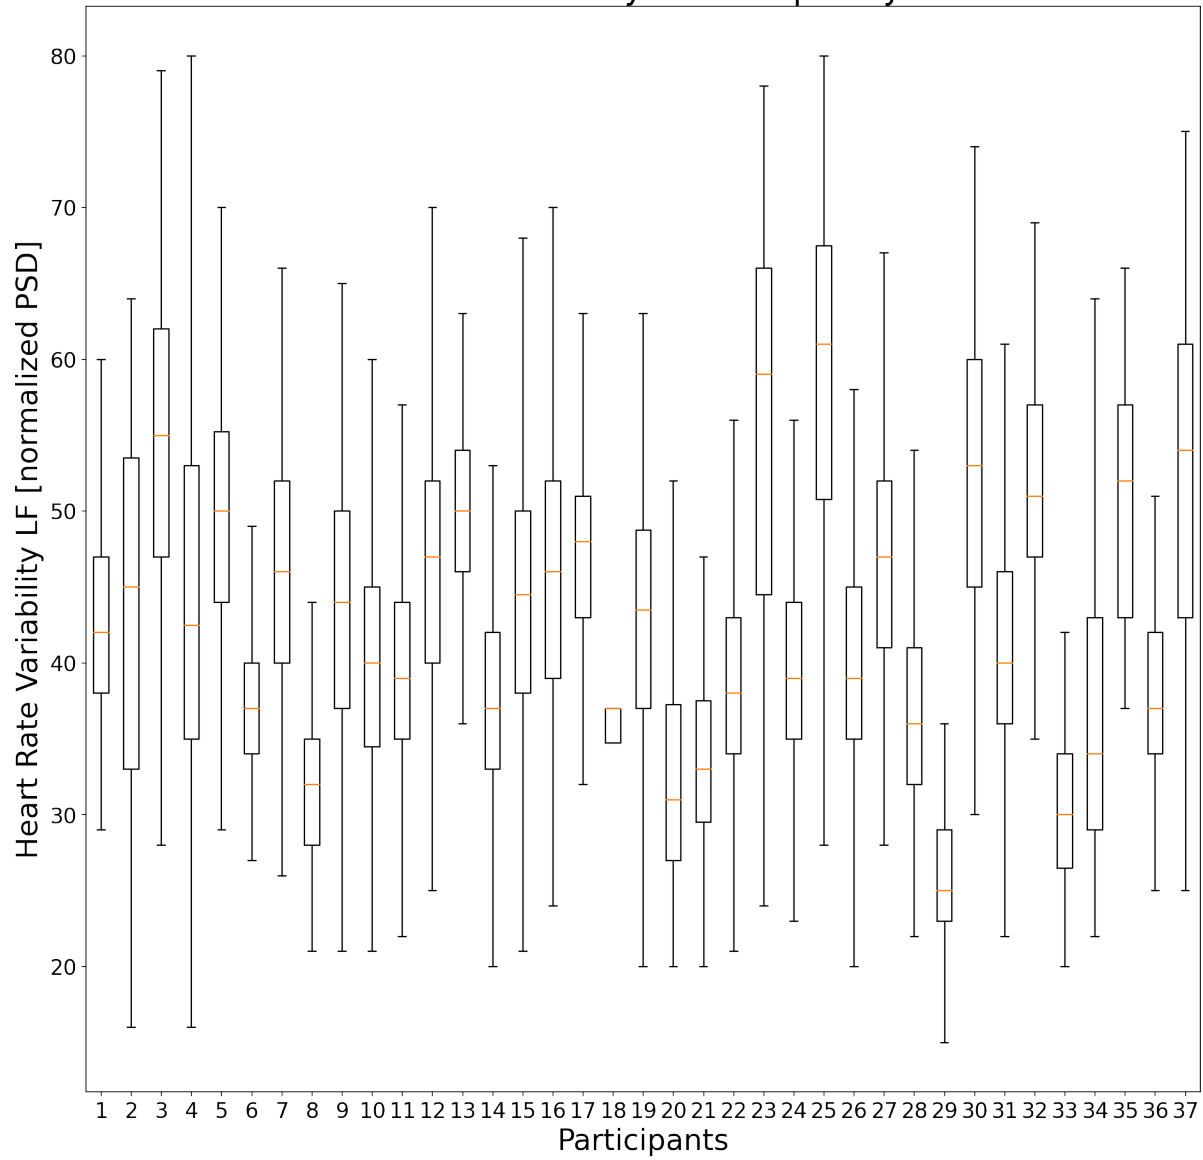

### Heart Rate Variability High Frequency Band

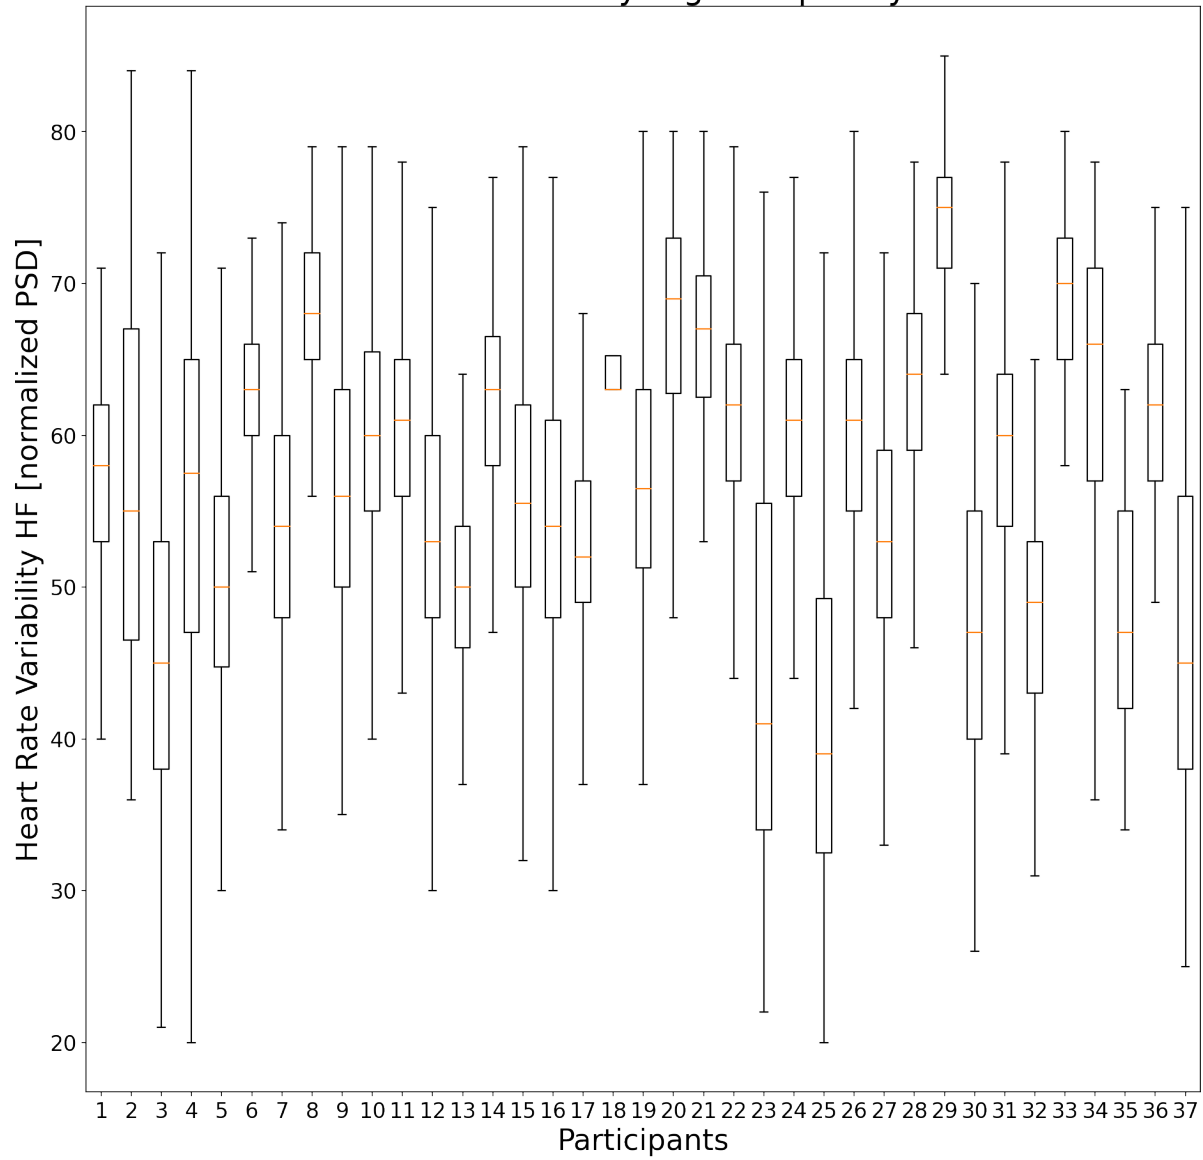



Sleep Onset Delay

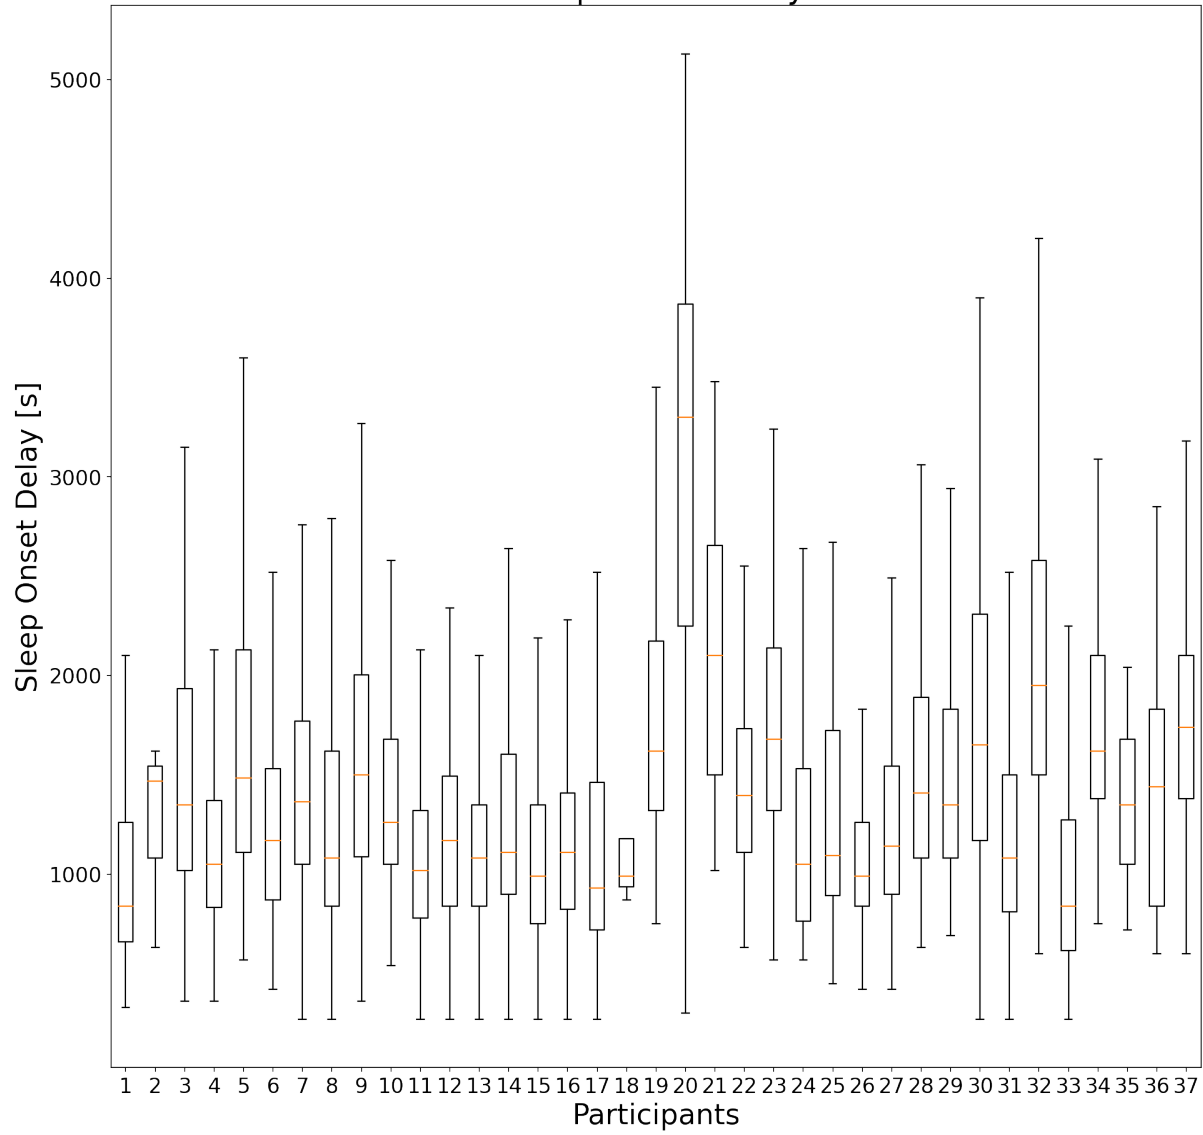

Total Sleep Segment Duration

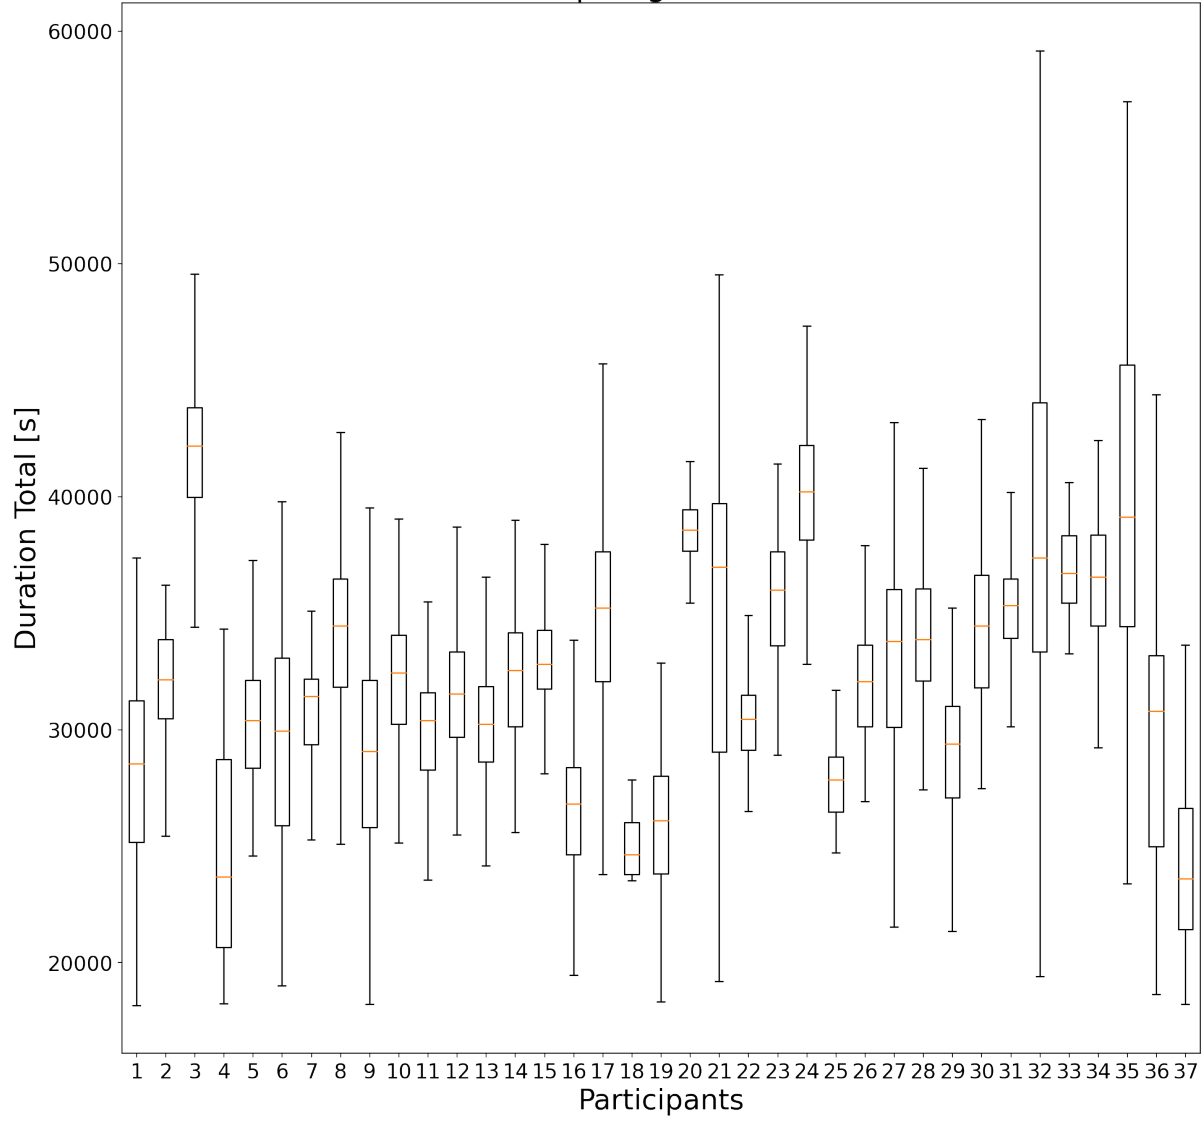

# Duration Asleep

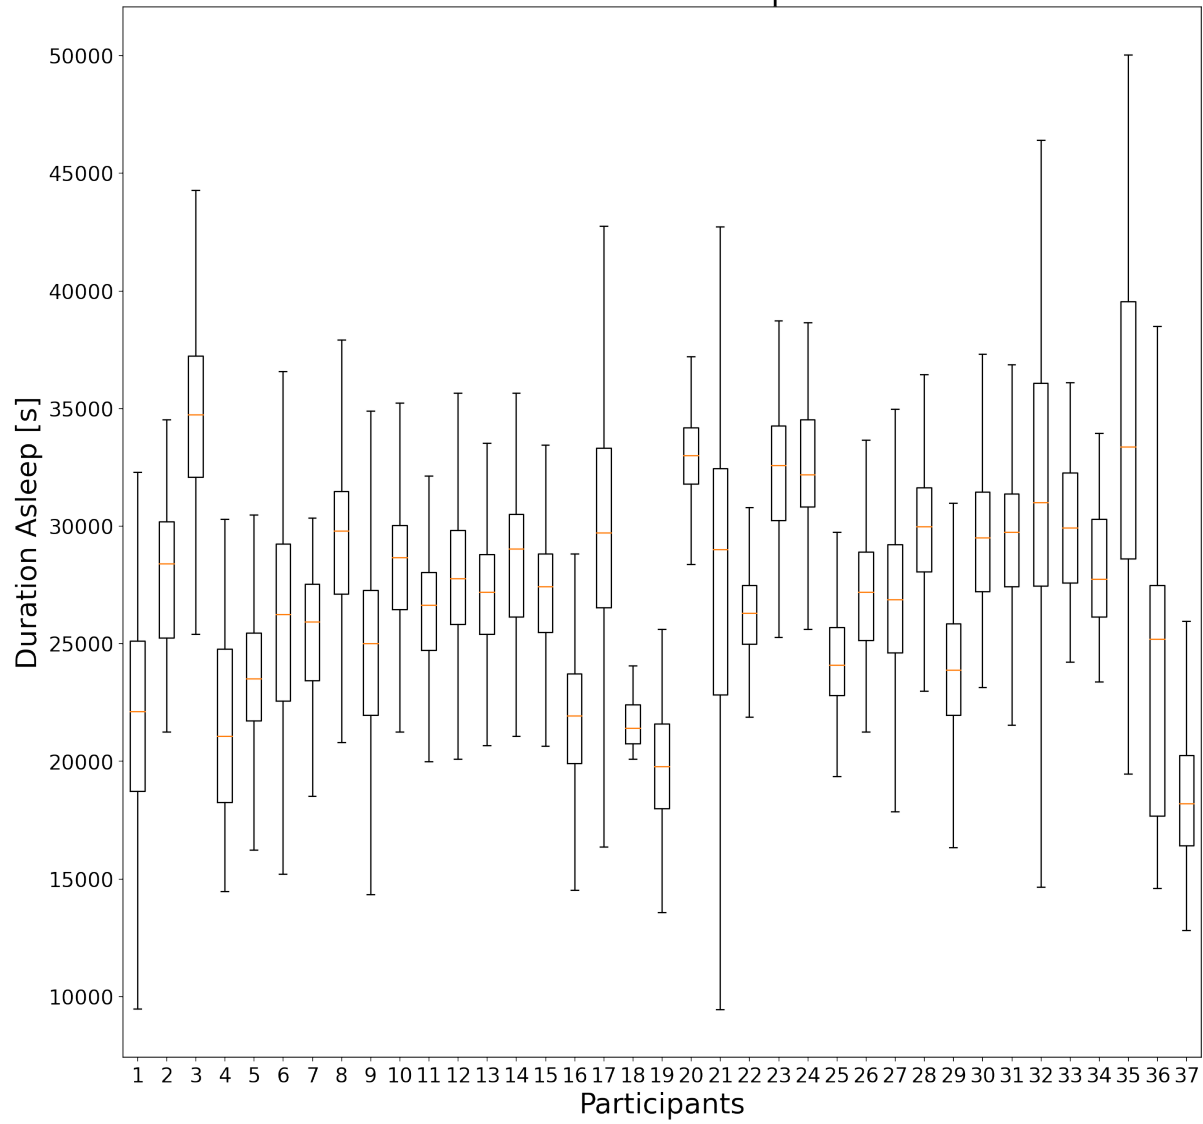

Duration in REM Sleep

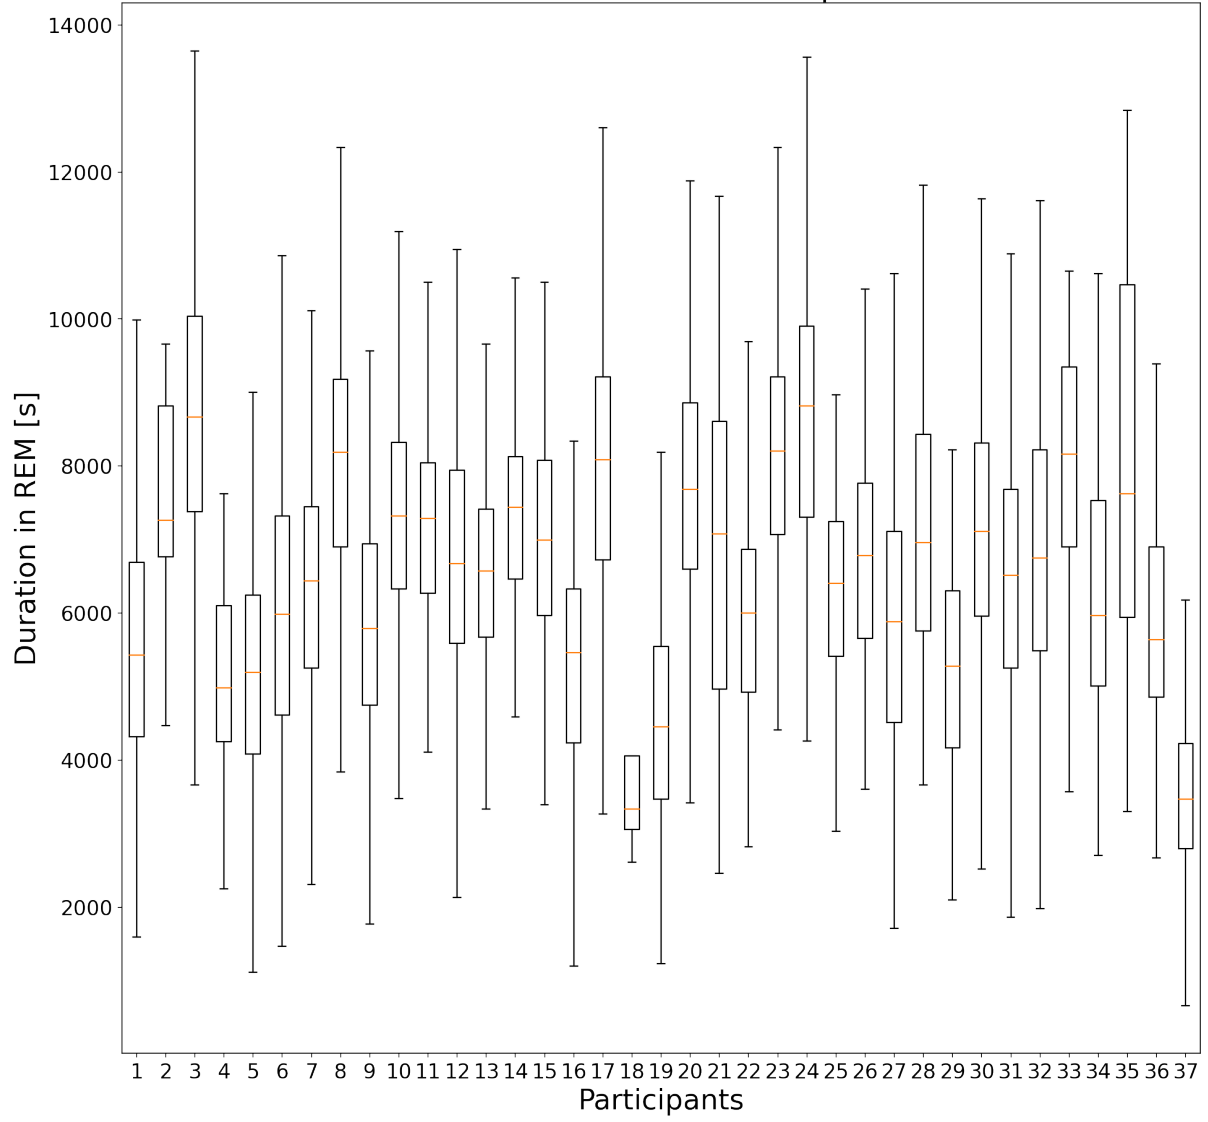

### Duration in Light Sleep

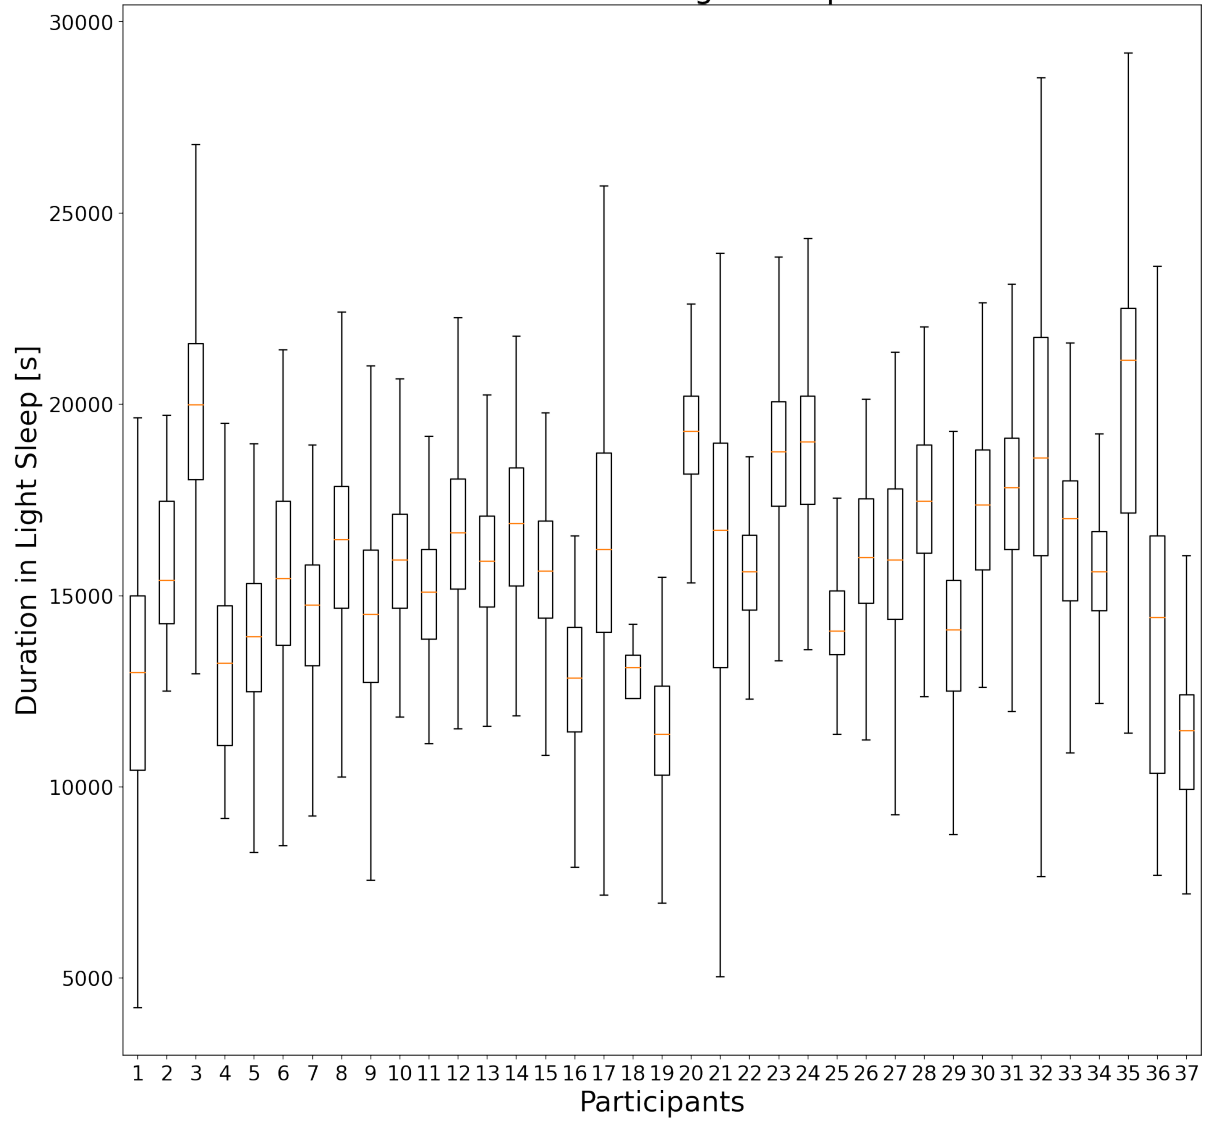

### Duration in Deep Sleep

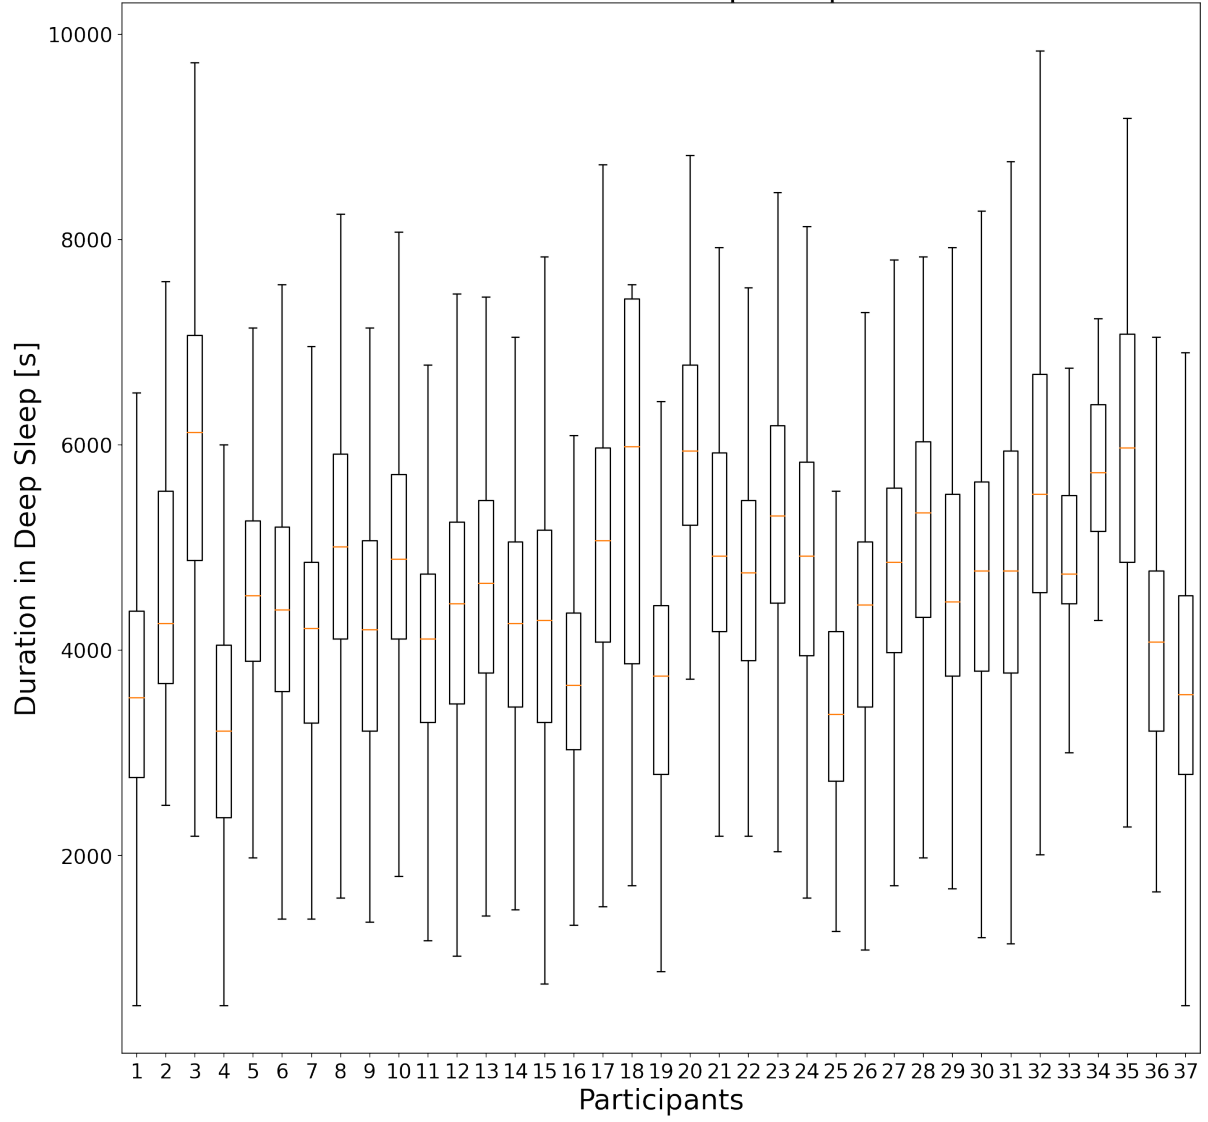

Total Duration in Bed

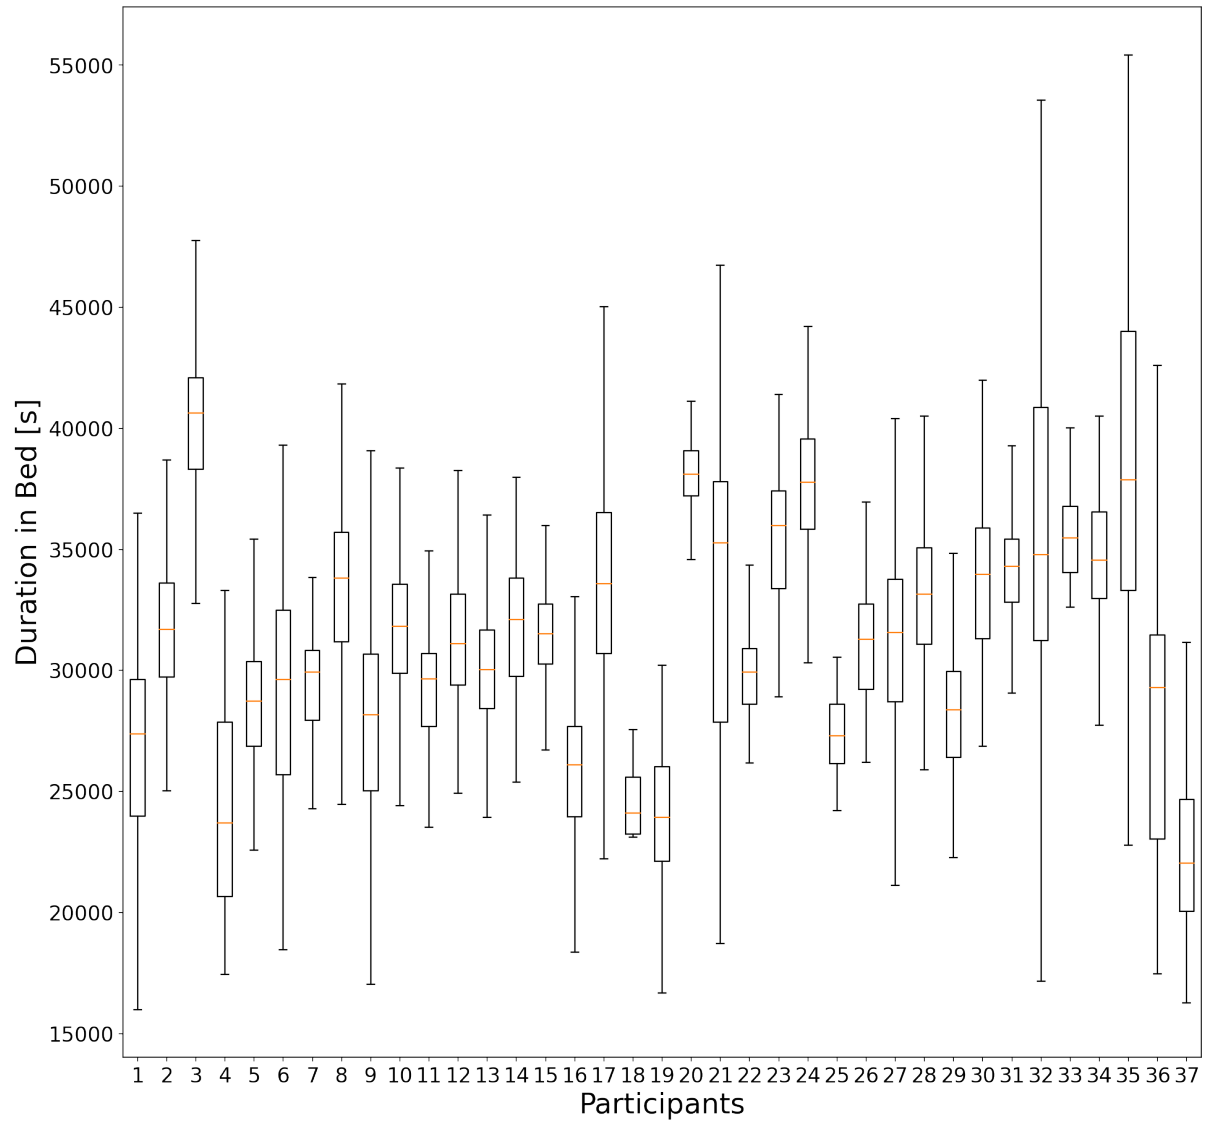

Duration Awake

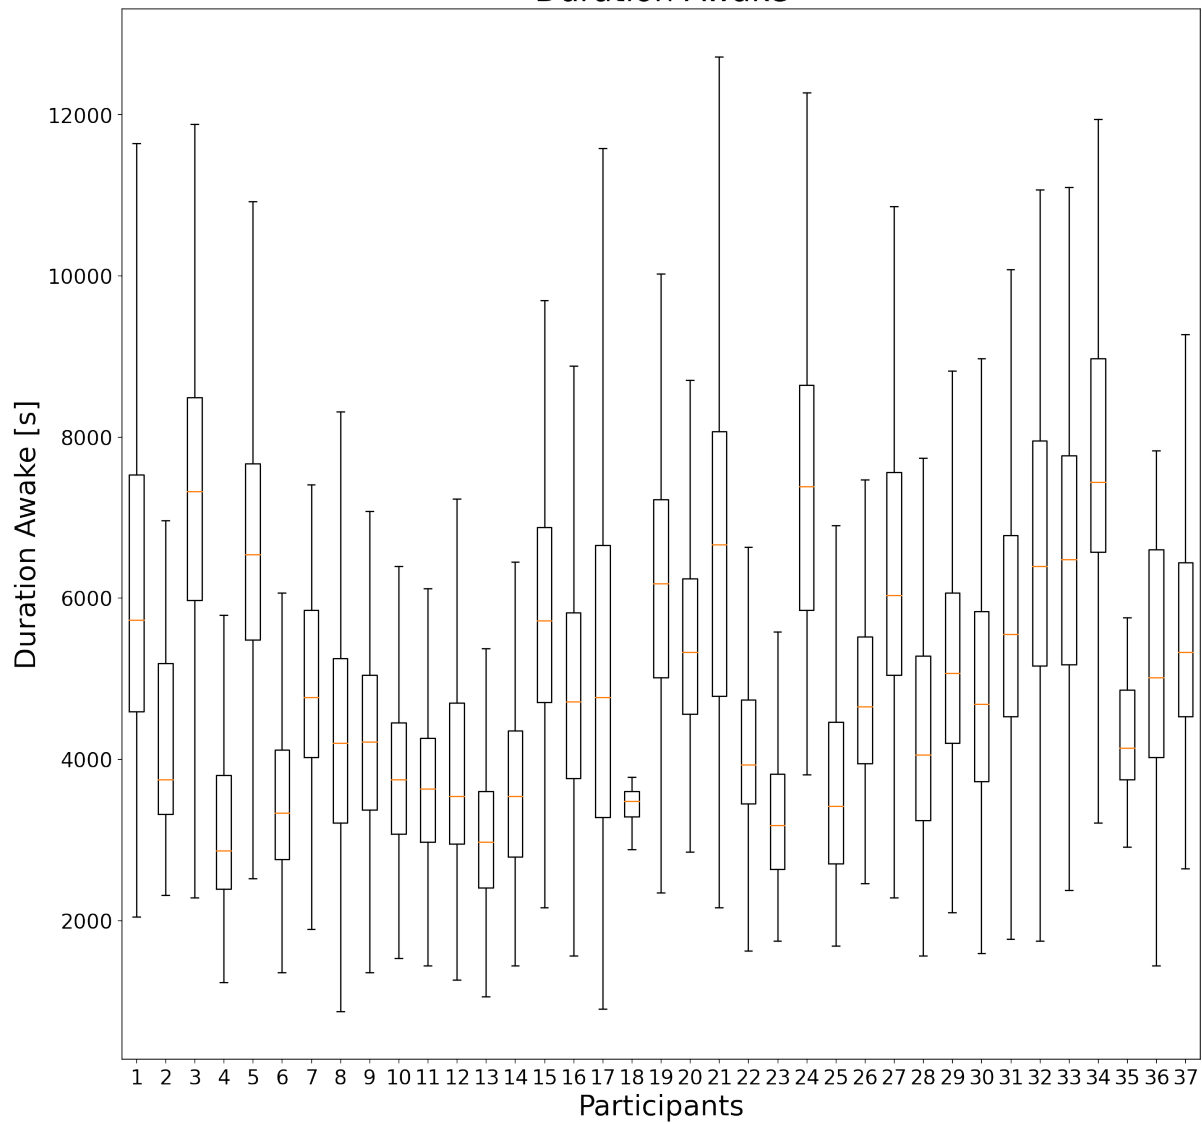



Duration out of Bed

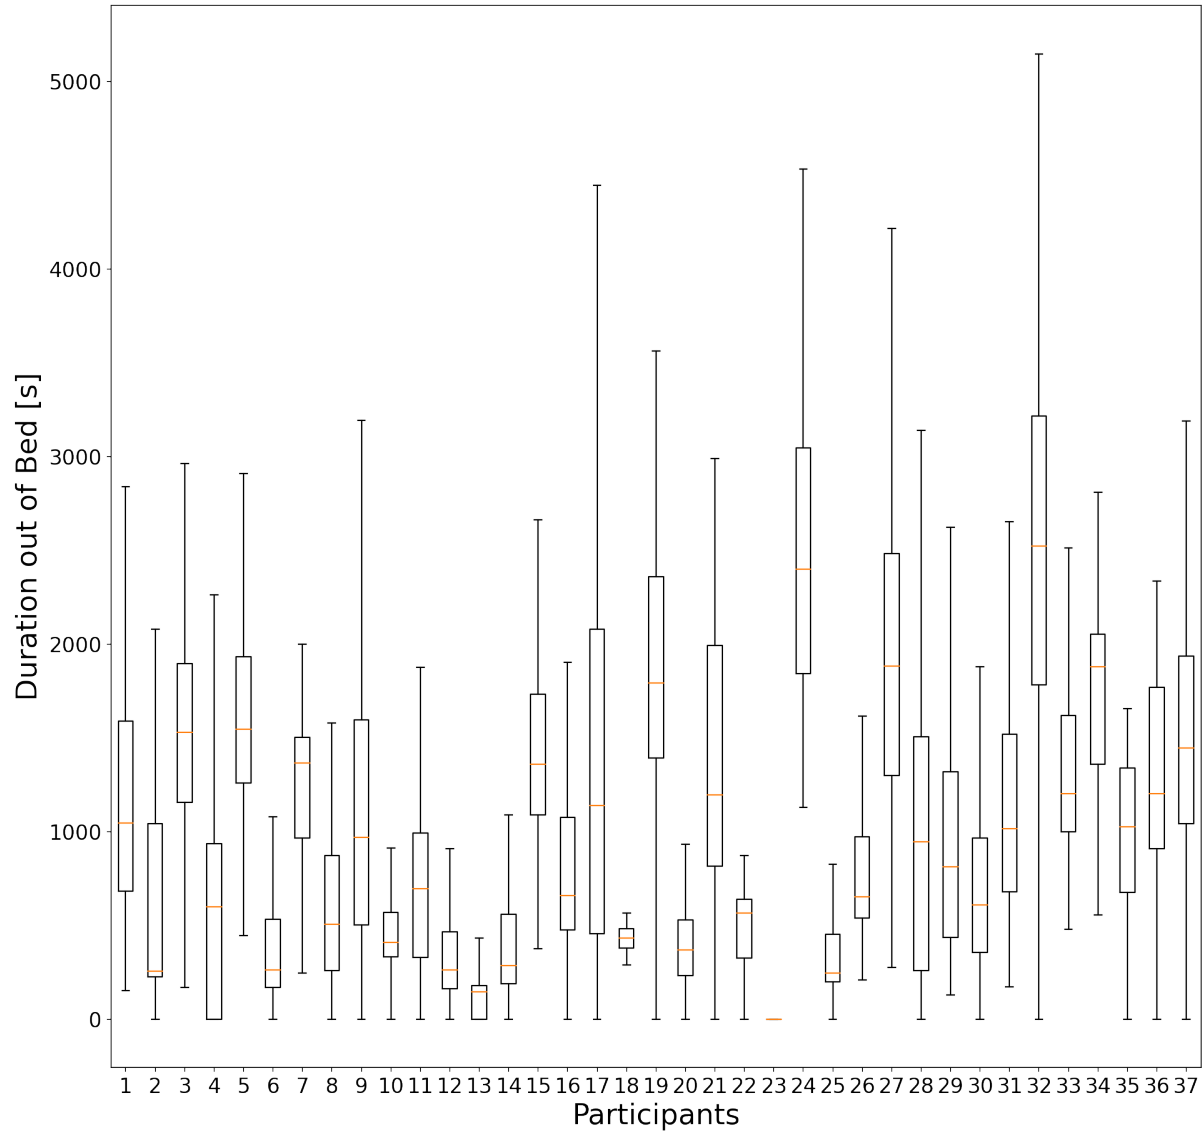

### Number Bed Exits per Night

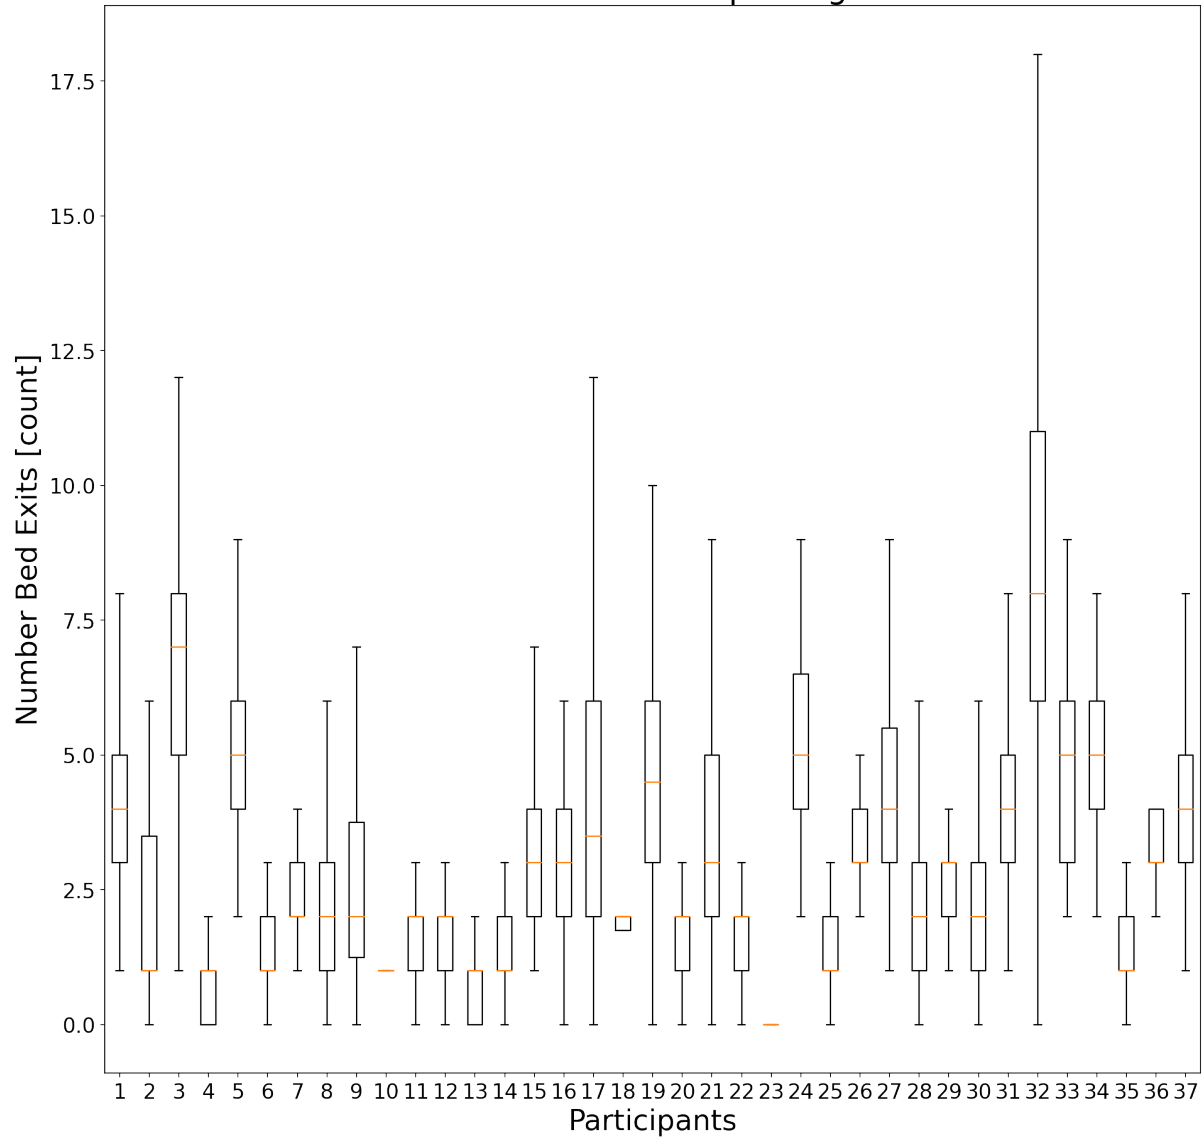

### Number Awakenings per Night

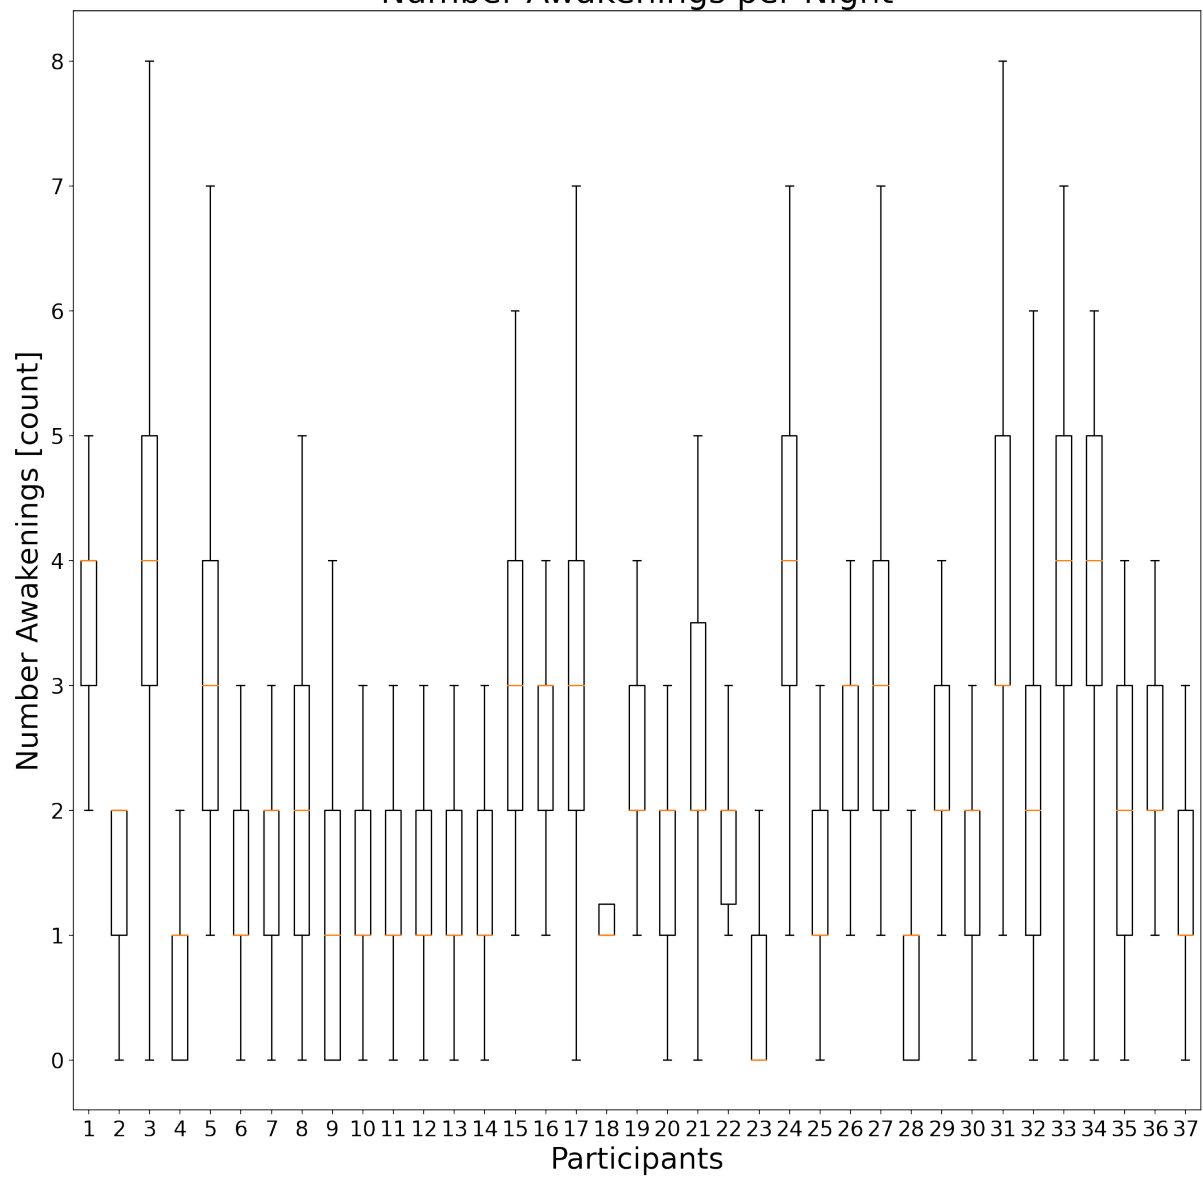

### Average Nightly Respiration Rate

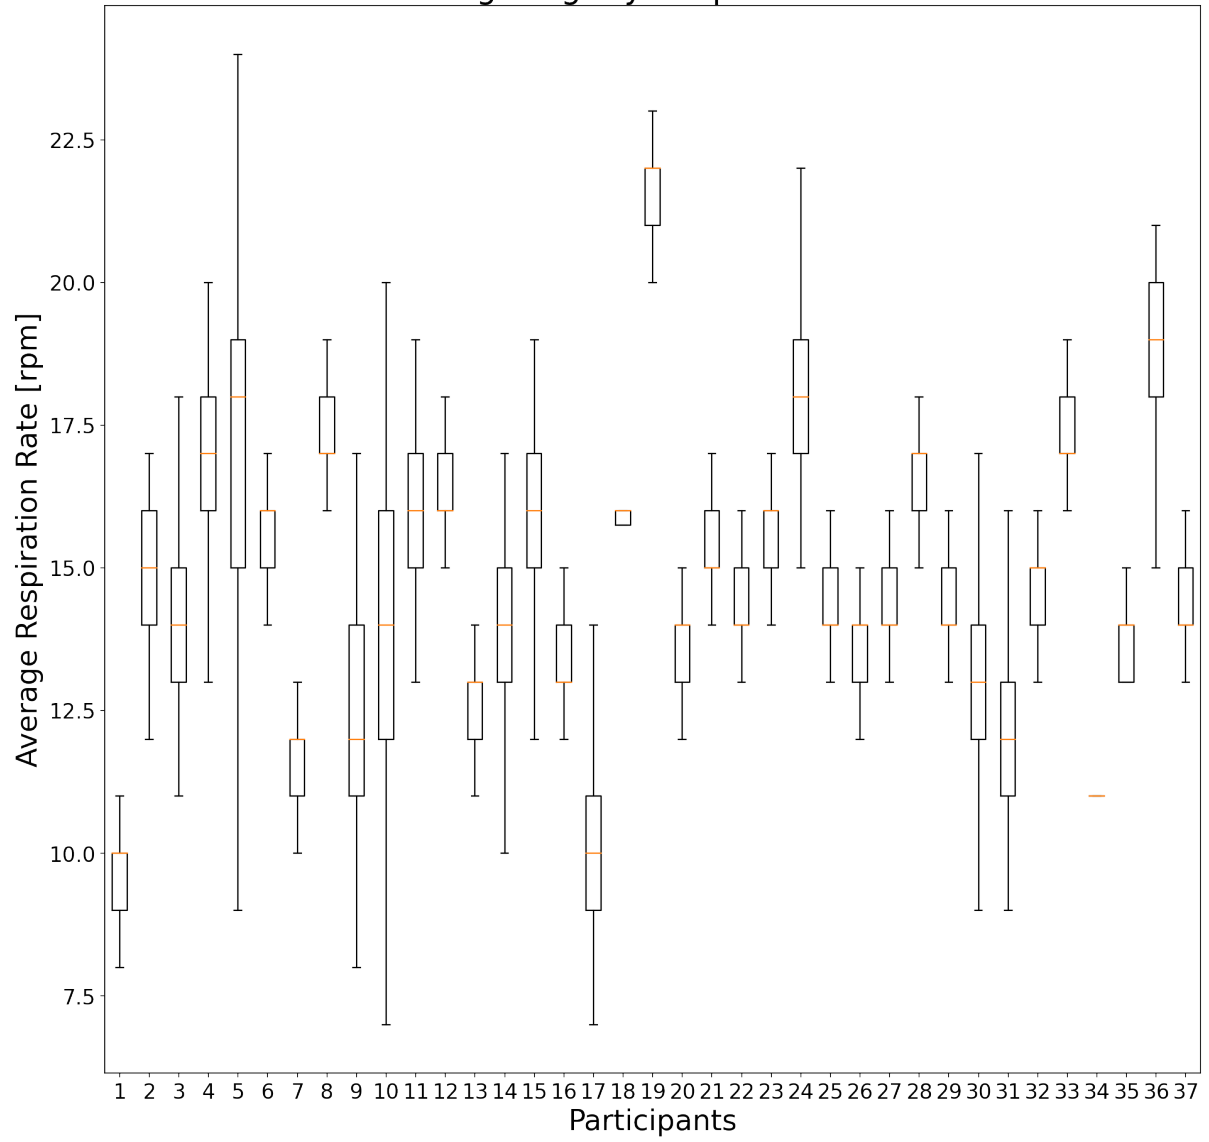

Supplement: mhealth_v9i6e24666_app1.pdf [file mhealth_v9i6e24666_app1.pdf]
